# Supplementary material for: Dissecting the Invasion-Associated Long Non-coding RNAs Using Single-Cell RNA-Seq Data of Glioblastoma
Source: Front Genet. 2021 Jan 11;11:633455. doi: 10.3389/fgene.2020.633455 (PMC7831882; doi:10.3389/fgene.2020.633455)
Supplement: Supplementary file 5 [file Table_5.XLSX]

## Sheet: Positively correlated lncRNAs
LncRNA_symbol	Cor	Pvalue
NEAT1	0.543718	0
MIR22HG	0.173309	2.03237e-47
MAP3K14	0.154009	1.07307e-37
TP53TG1	0.147439	1.17049e-34
SNHG11	0.138441	1.01847e-30
MAGI2-AS3	0.127923	1.95396e-26
SNHG9	0.126575	6.53484e-26
DLGAP1-AS1	0.121107	7.64091e-24
LINC00339	0.117606	1.44176e-22
ZNF503-AS2	0.113008	5.97925e-21
LINC00271	0.112366	9.94044e-21
A1BG-AS1	0.111103	2.68089e-20
LINC00847	0.0984066	3.06679e-16
SNHG10	0.09524	2.64659e-15
SLX1A-SULT1A3	0.0936638	7.53894e-15
SLX1B-SULT1A4	0.0936638	7.53894e-15
MBNL1-AS1	0.0921851	1.98153e-14
ZNF582-AS1	0.0921532	2.02303e-14
SNHG3	0.0883693	2.23697e-13
DTX2P1-UPK3BP1-PMS2P11	0.0880658	2.70081e-13
LINC00115	0.0822008	9.09901e-12
C1RL-AS1	0.0818567	1.11024e-11
DHRS4-AS1	0.0773757	1.37613e-10
TMEM44-AS1	0.0745607	6.23669e-10
LINC00174	0.0744004	6.78579e-10
PITPNA-AS1	0.0722437	2.07731e-09
NOP14-AS1	0.0705451	4.90363e-09
ADPGK-AS1	0.0703458	5.41675e-09
SDCBP2-AS1	0.0637575	1.24819e-07
SLC8A1-AS1	0.0636693	1.29914e-07
LINC00667	0.0623221	2.37819e-07
MIR210HG	0.0614203	3.54053e-07
LPP-AS2	0.0574705	1.89691e-06
FGD5-AS1	0.0571564	2.15805e-06
LINC00623	0.0561745	3.21623e-06
HLA-F-AS1	0.0554881	4.23474e-06
RAB11B-AS1	0.0535127	9.18432e-06
CD27-AS1	0.0526789	1.26352e-05
LINC00665	0.0479199	7.14517e-05
HCG25	0.0432258	0.00034099
HOTAIRM1	0.0396748	0.00101086
PXN-AS1	0.0392554	0.00114313
LINC00526	0.0388317	0.0012928
GAS5	0.0364159	0.00255067
XIST	0.0327288	0.00669612
ERVK13-1	0.0317605	0.00850519
TMEM51-AS1	0.0314268	0.00922327
WWTR1-AS1	0.0251841	0.0369532
ATP6V0E2-AS1	0.0246592	0.0410736

## Sheet: Negatively correlated lncRNAs
LncRNA_symbol	Cor	Pvalue
KCNQ1OT1	-0.336693	1.58416e-181
UGDH-AS1	-0.271569	2.57332e-116
ARHGEF26-AS1	-0.242111	4.00529e-92
PRICKLE2-AS3	-0.226813	8.74085e-81
RAMP2-AS1	-0.197975	1.30896e-61
LINC00485	-0.194909	9.79285e-60
LINC00689	-0.189242	2.34907e-56
LINC00507	-0.176222	5.44787e-49
ZNRF3-AS1	-0.172207	7.86372e-47
LINC00670	-0.156198	9.72733e-39
HCG11	-0.0967032	9.86151e-16
PART1	-0.0908145	4.78786e-14
CPB2-AS1	-0.0827694	6.53737e-12
PTCSC3	-0.07768	1.16498e-10
FBXL19-AS1	-0.0624666	2.23019e-07
STARD4-AS1	-0.0483736	6.09656e-05
RNF144A-AS1	-0.0480621	6.79949e-05
LINC00410	-0.0361384	0.00275119
AQP4-AS1	-0.0335386	0.00545735
LINC00467	-0.0334062	0.00564459
LMCD1-AS1	-0.0333506	0.00572482
LINC00476	-0.0306564	0.0110914
